# Supplementary material for: Precision Detection and Assessment of Ash Death and Decline Caused by the Emerald Ash Borer Using Drones and Deep Learning
Source: MDPI journal article supplement (doi:10.3390/plants12040798), 2023-02-10
Supplement: s1 [file s1]

**Table S1.** The number of declining or dead ash trees detected by ground survey and the Mask2former (deep learning model), and associated statistics including types I and II errors. This in-situ validation study was conducted in 9 different sites in Pennsylvania and West Virginia, USA, and two different thresholds (0.1 and 0.5) for the Mask2former were used.

| Threshold | Site | No. of ash trees detected by ground survey | No. of ash trees detected by Mask2former | % overestimation (+) or underestimation (-) by Mask2former | True positive | False negative (Type II error ) | False Positive (Type I error) |
|-----------|------|--------------------------------------------|------------------------------------------|------------------------------------------------------------|---------------|---------------------------------|-------------------------------|
| 0.1       | 1    | 18                                         | 18                                       | 0.0%                                                       | 77.8%         | 22.2%                           | 0.0%                          |
|           | 2    | 22                                         | 22                                       | 0.0%                                                       | 59.1%         | 40.9%                           | 0.0%                          |
|           | 3    | 26                                         | 26                                       | 0.0%                                                       | 84.6%         | 15.4%                           | 0.0%                          |
|           | 4    | 40                                         | 66                                       | 65.0%                                                      | 100.0%        | 0.0%                            | 65.0%                         |
|           | 5    | 76                                         | 76                                       | 0.0%                                                       | 86.8%         | 13.2%                           | 0.0%                          |
|           | 6    | 52                                         | 84                                       | 61.5%                                                      | 80.8%         | 19.2%                           | 61.5%                         |
|           | 7    | 93                                         | 110                                      | 18.3%                                                      | 80.6%         | 19.4%                           | 18.3%                         |
|           | 8    | 100                                        | 138                                      | 38.0%                                                      | 77.0%         | 23.0%                           | 38.0%                         |
|           | 9    | 63                                         | 115                                      | 82.5%                                                      | 82.5%         | 17.5%                           | 82.5%                         |
| 0.5       | 1    | 18                                         | 18                                       | 0.0%                                                       | 16.7%         | 83.3%                           | 0.0%                          |
|           | 2    | 22                                         | 22                                       | 0.0%                                                       | 36.4%         | 63.6%                           | 0.0%                          |
|           | 3    | 26                                         | 26                                       | 0.0%                                                       | 26.9%         | 73.1%                           | 0.0%                          |
|           | 4    | 40                                         | 50                                       | 25.0%                                                      | 37.5%         | 62.5%                           | 25.0%                         |
|           | 5    | 76                                         | 66                                       | -13.2%                                                     | 55.3%         | 31.6%                           | 0.0%                          |
|           | 6    | 52                                         | 60                                       | 15.4%                                                      | 17.3%         | 82.7%                           | 15.4%                         |
|           | 7    | 93                                         | 94                                       | 1.1%                                                       | 20.4%         | 79.6%                           | 1.1%                          |
|           | 8    | 100                                        | 105                                      | 5.0%                                                       | 14.0%         | 86.0%                           | 5.0%                          |
|           | 9    | 63                                         | 68                                       | 7.9%                                                       | 19.0%         | 81.0%                           | 7.9%                          |

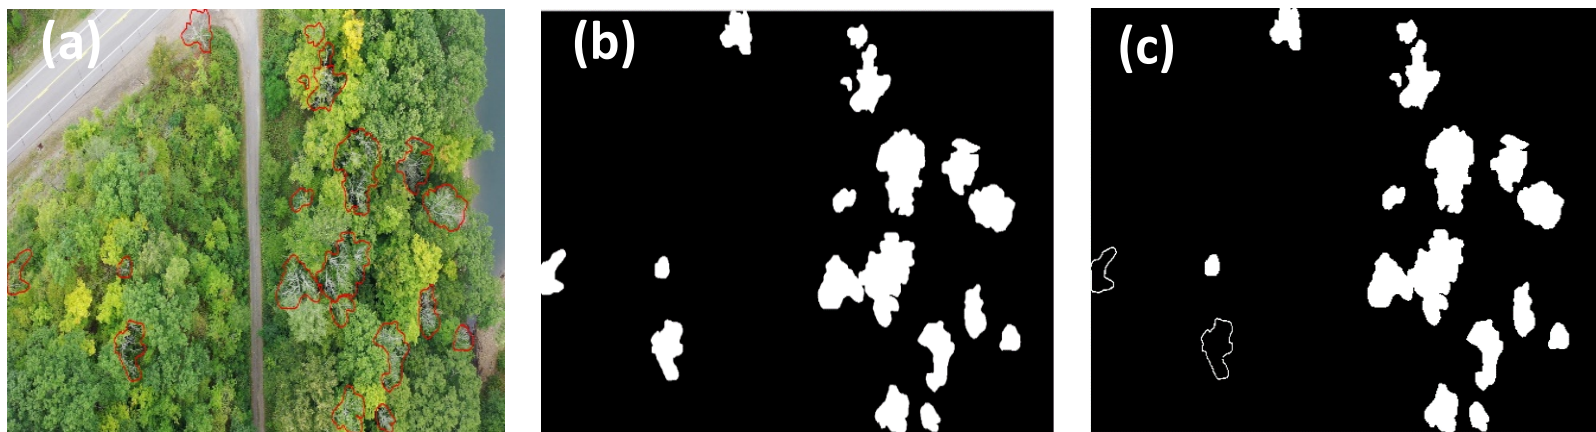

**Figure S1.** Disadvantages of image resizing in segmentation. (a), RGB image; (b), mask generated after cropping the RGB image into patches; (c), mask generated by resizing the RGB image.

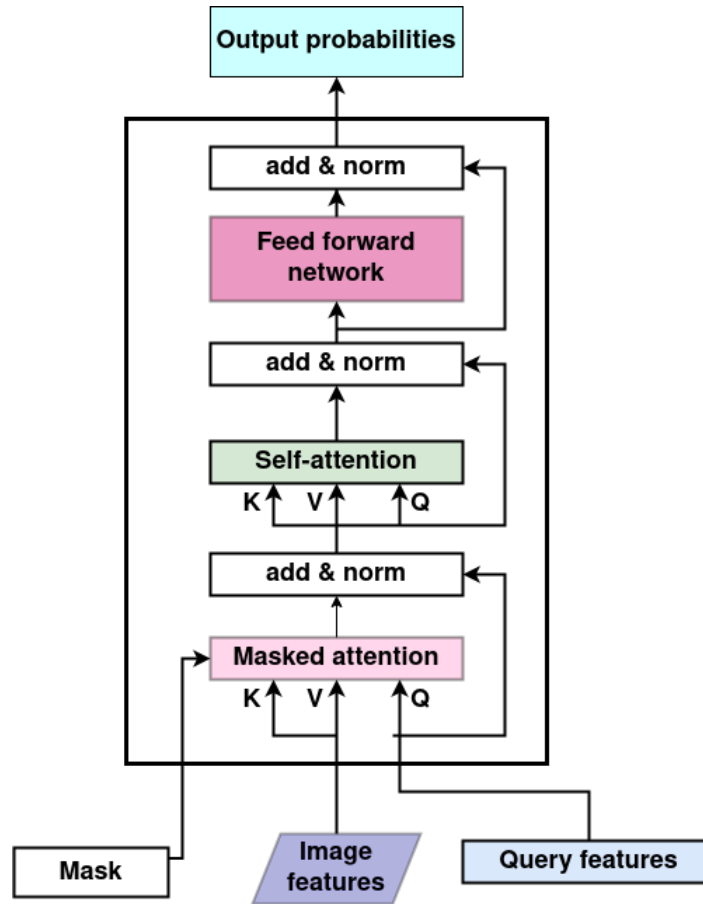

**Figure S2.** Transformer decoder architecture of the Mask2former model. The Queries (Q), Keys (K), and Values (V) vectors derived from the RGB image are fed to the cross-attention block, self-attention block, and the feed-forward network (FFN) to obtain segmentation maps and bounding boxes with a class label.

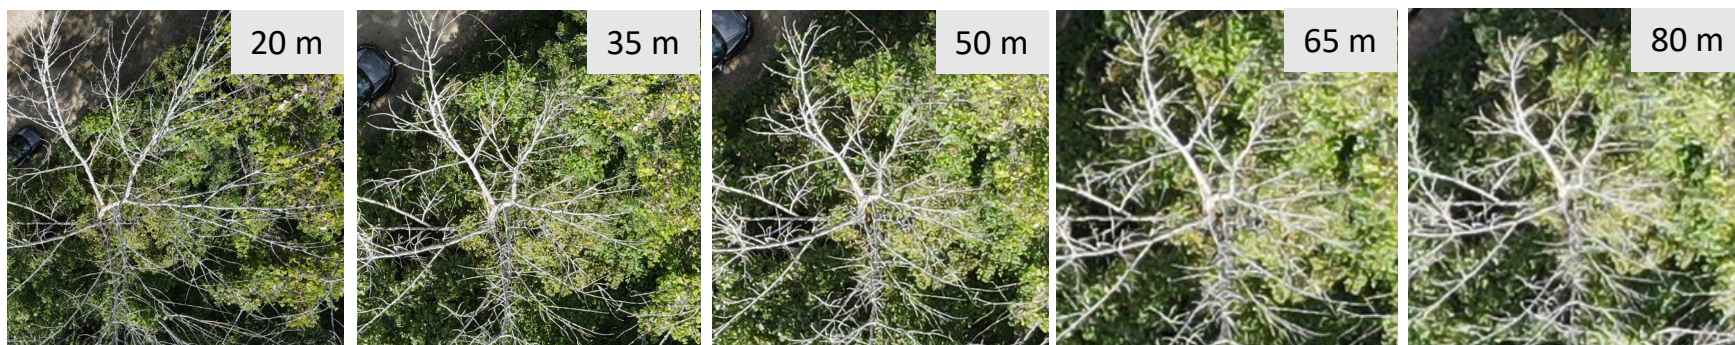

**Figure S3.** Resolutions of aerial images showing ash tree dieback at different drone flight altitudes. Even 80 m above the ground, aerial images show the opposite branching pattern of declining ash trees.
